# Supplementary material
Source: HighWire-hosted journal article supplement (https://ijgc.bmj.com/highwire/filestream/20288/field_highwire_adjunct_files/0/ijgc-2021-002823supp001_data_supplement.pdf)
Supplement: ijgc-2021-002823supp001_data_supplement.pdf [file ijgc-2021-002823supp001_data_supplement.pdf]

## Material

|                                      |
|--------------------------------------|
| Urinary catheter                     |
| One 12mm trocar + three 5mm trocars  |
| 0° camera                            |
| Graspers                             |
| Bipolar                              |
| Aspirator                            |
| Scissors (monopolar energy)          |
| Endobag                              |
| Clermont-Ferrand Uterine manipulator |
| PDS 0 suture                         |
| Staples                              |
